# Supplementary material
Source: Springer Nature journal article supplement (https://www.springermedizin.de/resource/supplementary/12943_2014_1352_MOESM5_ESM.pdf/9552764)

# A Somatic structural rearrangements

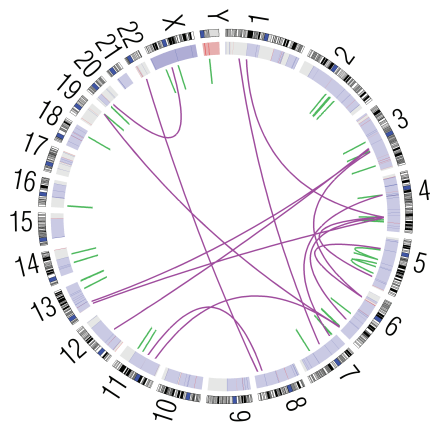

Total 63 rearrangements

APC deletion

# B Somatic mutations

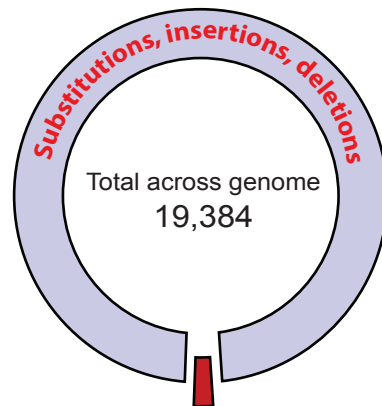

Total 119 non-synonymous coding mutations (116 genes)

*EGFR* G724S  
*TP53* R175H

# C

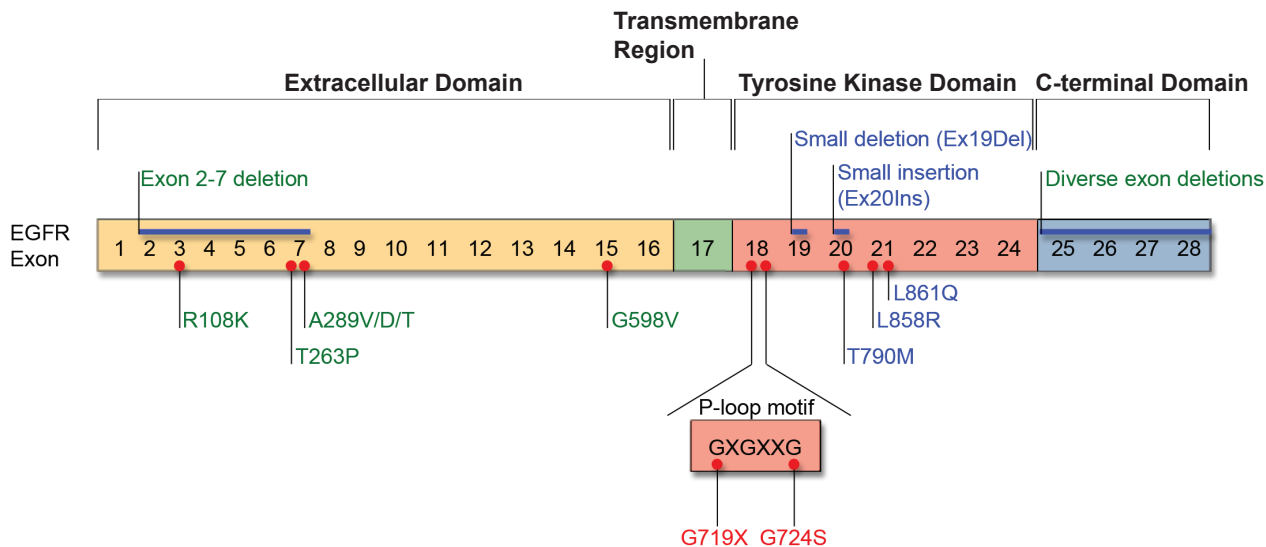

Supplement: MOESM5 [file 9552764]
